# Supplementary material
Source: MDPI journal article supplement (https://www.mdpi.com/2813-2882/1/3/8)
Supplement: s1 [file s1 › future-2553969-supplementary.pdf]

### Supplementary

**Table S1.** Comparison of cause name, ICD10 codes, cause levels and unique codes used in this study.

| Cause name                                                  | ICD-10 code                                                                                                                    | Cause level | The unique code used in this study |
|-------------------------------------------------------------|--------------------------------------------------------------------------------------------------------------------------------|-------------|------------------------------------|
| All causes                                                  | —                                                                                                                              | —           | ALL                                |
| Communicable, maternal, neonatal, and nutritional diseases  | A00–B99, G00–G04, N70–N73, J00–J06, J10–J18, J20–J22, H65–H66, O00–O99, P00–P96, E00–E02, E40–E46, E50, D50–D53, D64.9, E51–64 | 1           | A                                  |
| Infectious and parasitic diseases                           | A00–B99, G00, G03–G04, N70–N73                                                                                                 | 2           | A1                                 |
| Tuberculosis                                                | A15–A19, B90                                                                                                                   | 3           | A1–1                               |
| Sexually transmitted infections excluding HIV               | A50–A64, N70–N73                                                                                                               | 3           | A1–2                               |
| HIV/AIDS                                                    | B20–B24                                                                                                                        | 3           | A1–3                               |
| Diarrheal disease                                           | A00, A01, A03, A04, A06–A09                                                                                                    | 3           | A1–4                               |
| Whooping cough, poliomyelitis, diphtheria, measles, tetanus | A33–A37, A80, B05, B91                                                                                                         | 3           | A1–5                               |
| Meningitis                                                  | A39, G00, G03                                                                                                                  | 3           | A1–6                               |
| Hepatitis B                                                 | B16–B19 (exclude B17.1, B18.2)                                                                                                 | 3           | A1–7                               |
| Malaria                                                     | B50–B54                                                                                                                        | 3           | A1–8                               |
| Tropical disease                                            | B55–B57, B65, B73, B74.0–B74.2                                                                                                 | 3           | A1–9                               |
| Mosquito-borne viral encephalitis                           | A83.0                                                                                                                          | 3           | A1–10                              |
| Leptospirosis                                               | A27                                                                                                                            | 3           | A1–11                              |
| Haemorrhagic fever                                          | A98.5                                                                                                                          | 3           | A1–12                              |
| Sepsis                                                      | A40–A41                                                                                                                        | 3           | A1–13                              |
| Leprosy                                                     | A30                                                                                                                            | 3           | A1–14                              |
| Dengue                                                      | A90–A91                                                                                                                        | 3           | A1–15                              |

| Cause name                                                                                 | ICD-10 code                                    | Cause level | The unique code used in this study |
|--------------------------------------------------------------------------------------------|------------------------------------------------|-------------|------------------------------------|
| Trachoma                                                                                   | A71                                            | 3           | A1–16                              |
| Intestinal nematode infections                                                             | B76–B81                                        | 3           | A1–17                              |
| Respiratory infections                                                                     | J00–J06, J10–J18, J20–J22, H65–H66             | 2           | A2                                 |
| Lower respiratory infections                                                               | J10–J18, J20–J22                               | 3           | A2–1                               |
| Upper respiratory infections                                                               | J00–J06                                        | 3           | A2–2                               |
| Otitis media                                                                               | H65–H66                                        | 3           | A2–3                               |
| Pregnancy, childbirth and the puerperium                                                   | O00–O99                                        | 2           | A3                                 |
| Maternal hemorrhage                                                                        | O44–O46, O67, O72                              | 3           | A3–1                               |
| Puerperal sepsis                                                                           | O85–O86                                        | 3           | A3–2                               |
| Oedema, proteinuria and hypertensive disorders in pregnancy, childbirth and the puerperium | O10–O16                                        | 3           | A3–3                               |
| Obstructed labour                                                                          | O64–O66                                        | 3           | A3–4                               |
| Abortion                                                                                   | O00–O07                                        | 3           | A3–5                               |
| Certain conditions originating in the perinatal period                                     | P00–P96                                        | 2           | A4                                 |
| Low birth weight                                                                           | P05–P07                                        | 3           | A4–1                               |
| Birth trauma and asphyxia                                                                  | P03, P10–P15, P20–P29                          | 3           | A4–2                               |
| Hemolytic disease of newborn                                                               | P55–P57                                        | 3           | A4–3                               |
| Sclerema neonatorum                                                                        | P83.0                                          | 3           | A4–4                               |
| Nutritional deficiency                                                                     | E00–E02, E40–E46, E50, D50–D53, D64.9, E51–E64 | 2           | A5                                 |
| Malnutrition                                                                               | E40–E46                                        | 3           | A5–1                               |
| iodine-deficiency hypothyroidism                                                           | E00–E02                                        | 3           | A5–2                               |
| Vitamin A deficiency                                                                       | E50                                            | 3           | A5–3                               |
| Iron deficiency anaemia                                                                    | D50, D64.9                                     | 3           | A5–4                               |

| Cause name                                              | ICD-10 code                                                                                                                                                                               | Cause level | The unique code used in this study |
|---------------------------------------------------------|-------------------------------------------------------------------------------------------------------------------------------------------------------------------------------------------|-------------|------------------------------------|
| Non-communicable diseases                               | C00–C97, D00–D48, D55–D89 (exclude D64.9), E03–E07, E10–E16, E20–E34, E65–E88, F01–F99, G06–G98, H00–H61, H68–H93, I00–I99, J30–J98, K00–K92, N00–N64, N75–N98, L00–L98, M00–M99, Q00–Q99 | 1           | B                                  |
| Malignant neoplasms                                     | C00–C97                                                                                                                                                                                   | 2           | B1                                 |
| Malignant neoplasm of lip, mouth and oropharynx         | C00–C14                                                                                                                                                                                   | 3           | B1–1                               |
| Malignant neoplasm of oesophagus                        | C15                                                                                                                                                                                       | 3           | B1–2                               |
| Malignant neoplasm of stomach                           | C16                                                                                                                                                                                       | 3           | B1–3                               |
| Malignant neoplasm of colon and rectum                  | C18–C21                                                                                                                                                                                   | 3           | B1–4                               |
| Malignant neoplasm of liver and intrahepatic bile ducts | C22                                                                                                                                                                                       | 3           | B1–5                               |
| Malignant neoplasm of pancreas                          | C25                                                                                                                                                                                       | 3           | B1–6                               |
| Malignant neoplasm of lung                              | C33–C34                                                                                                                                                                                   | 3           | B1–7                               |
| Melanoma and other malignant neoplasms of skin          | C43–C44                                                                                                                                                                                   | 3           | B1–8                               |
| Malignant neoplasm of breast                            | C50                                                                                                                                                                                       | 3           | B1–9                               |
| Malignant neoplasm of cervix uteri                      | C53                                                                                                                                                                                       | 3           | B1–10                              |
| Malignant neoplasm of corpus uteri                      | C54–C55                                                                                                                                                                                   | 3           | B1–11                              |
| Malignant neoplasm of ovary                             | C56                                                                                                                                                                                       | 3           | B1–12                              |
| Malignant neoplasm of prostate                          | C61                                                                                                                                                                                       | 3           | B1–13                              |
| Malignant neoplasm of bladder                           | C67                                                                                                                                                                                       | 3           | B1–14                              |
| Lymphoma and multiple myeloma                           | C81–C90, C96                                                                                                                                                                              | 3           | B1–15                              |
| Leukaemia                                               | C91–C95                                                                                                                                                                                   | 3           | B1–16                              |
| Other neoplasms                                         | D00–D48                                                                                                                                                                                   | 2           | B2                                 |
| Benign tumor                                            | D10–D36                                                                                                                                                                                   | 3           | B2–1                               |
| Diabetes                                                | E10–E14                                                                                                                                                                                   | 2           | B3                                 |

| Cause name                                            | ICD-10 code                                                 | Cause level | The unique code used in this study |
|-------------------------------------------------------|-------------------------------------------------------------|-------------|------------------------------------|
| Endocrine disorder                                    | D55–D89 (exclude D64.9), E03–E07, E15–E16, E20–E34, E65–E88 | 2           | B4                                 |
| Diseases of the nervous system and mental disorders   | F01–F99, G06–G98                                            | 2           | B5                                 |
| Depressive episode                                    | F32–F33                                                     | 3           | B5–1                               |
| Bipolar affective disorder                            | F30–F31                                                     | 3           | B5–2                               |
| Schizophrenia                                         | F20–F29                                                     | 3           | B5–3                               |
| Epilepsy                                              | G40–G41                                                     | 3           | B5–4                               |
| Mental and behavioural disorders due to alcohol use   | F10                                                         | 3           | B5–5                               |
| Alzheimer disease and dementia                        | F01, F03, G30–G31                                           | 3           | B5–6                               |
| Parkinson disease                                     | G20–G21                                                     | 3           | B5–7                               |
| Multiple sclerosis                                    | G35                                                         | 3           | B5–8                               |
| Mental and behavioural disorders due to substance use | F11–F16, F18–F19                                            | 3           | B5–9                               |
| Post-traumatic stress disorder                        | F43.1                                                       | 3           | B5–10                              |
| Obsessive-compulsive disorder                         | F42                                                         | 3           | B5–11                              |
| Panic disorder                                        | F40.0, F41.0                                                | 3           | B5–12                              |
| Nonorganic sleep disorders                            | F51                                                         | 3           | B5–13                              |
| Migraine                                              | G43                                                         | 3           | B5–14                              |
| Mental retardation                                    | F70–F79                                                     | 3           | B5–15                              |
| Sensory disease                                       | H00–H61, H68–H93                                            | 2           | B6                                 |
| Glaucoma                                              | H40                                                         | 3           | B6–1                               |
| Cataract                                              | H25–H26                                                     | 3           | B6–2                               |
| Presbyopia                                            | H52.4                                                       | 3           | B6–3                               |
| Hearing loss beginning in adulthood                   | H90–H91                                                     | 3           | B6–4                               |
| Cardiovascular disease                                | I00–I99**                                                   | 2           | B7                                 |
| Acute rheumatic fever                                 | I00–I02                                                     | 3           | B7–1                               |
| Rheumatic heart diseases                              | I01–I09                                                     | 3           | B7–2                               |
| Hypertensive diseases                                 | I10–I13                                                     | 3           | B7–3                               |

| Cause name                                                   | ICD-10 code                     | Cause level | The unique code used in this study |
|--------------------------------------------------------------|---------------------------------|-------------|------------------------------------|
| Ischemic heart diseases                                      | I20–I25                         | 3           | B7–4                               |
| Cerebrovascular diseases                                     | I60–I69                         | 3           | B7–5                               |
| Inflammatory heart disease                                   | I30–I33, I38, I40, I42          | 3           | B7–6                               |
| Diseases of the respiratory system                           | J30–J98**                       | 2           | B8                                 |
| Chronic obstructive pulmonary disease                        | J40–J44**                       | 3           | B8–1                               |
| Asthma                                                       | J45–J46                         | 3           | B8–2                               |
| Pneumoconiosis                                               | J60–J65                         | 3           | B8–3                               |
| Diseases of the digestive system                             | K20–K92                         | 2           | B9                                 |
| Peptic ulcer                                                 | K25–K27                         | 3           | B9–1                               |
| Cirrhosis of liver                                           | K70, K74                        | 3           | B9–2                               |
| Appendicitis                                                 | K35–K37                         | 3           | B9–3                               |
| Ileus                                                        | K56                             | 3           | B9–4                               |
| Diseases of the genitourinary system                         | N00–N64, N75–N98                | 2           | B10                                |
| Nephritis and kidney disease                                 | N00–N19                         | 3           | B10–1                              |
| Hyperplasia of prostate                                      | N40                             | 3           | B10–2                              |
| Diseases of the skin and subcutaneous tissue                 | L00–L98                         | 2           | B11                                |
| Diseases of the musculoskeletal system and connective tissue | M00–M99                         | 2           | B12                                |
| Rheumatoid arthritis                                         | M05–M06                         | 3           | B12–1                              |
| Arthrosis                                                    | M15–M19                         | 3           | B12–2                              |
| Gout                                                         | M10                             | 3           | B12–3                              |
| Dorsalgia                                                    | M45–M48, M54<br>(exclude M54.2) | 3           | B12–4                              |
| Pregnancy, childbirth and the puerperium                     | Q00–Q99                         | 2           | B13                                |
| Congenital malformations of abdominal wall                   | Q79.2–Q79.5                     | 3           | B13–1                              |
| Anencephaly and similar malformations                        | Q00                             | 3           | B13–2                              |
| Congenital absence, atresia and stenosis of large intestine  | Q42                             | 3           | B13–3                              |
| Cleft lip                                                    | Q36                             | 3           | B13–4                              |

| Cause name                                                 | ICD-10 code                          | Cause level | The unique code used in this study |
|------------------------------------------------------------|--------------------------------------|-------------|------------------------------------|
| Cleft palate                                               | Q35, Q37                             | 3           | B13–5                              |
| Atresia of oesophagus                                      | Q39.0–Q39.1                          | 3           | B13–6                              |
| Renal agenesis                                             | Q60                                  | 3           | B13–7                              |
| Down syndrome                                              | Q90                                  | 3           | B13–8                              |
| Congenital malformations of the circulatory system         | Q20–Q28                              | 3           | B13–9                              |
| Spina bifida                                               | Q05                                  | 3           | B13–10                             |
| Diseases of oral cavity, salivary glands and jaws          | K00–K14                              | 2           | B14                                |
| Dental caries                                              | K02                                  | 3           | B14–1                              |
| Periodontal diseases                                       | K05                                  | 3           | B14–2                              |
| Anodontia                                                  | —                                    | 3           | B14–3                              |
| Injuries                                                   | V01–Y89                              | 1           | C                                  |
| Unintentional injuries                                     | V01–X59, Y40–Y86, Y88, Y89           | 2           | C1                                 |
| Road injuries                                              | V01–V04, V06, V09–V80, V87, V89, V99 | 3           | C1–1                               |
| Accidental poisoning by and exposure to noxious substances | X40–X49                              | 3           | C1–2                               |
| Falls                                                      | W00–W19                              | 3           | C1–3                               |
| Exposure to smoke, fire and flames                         | X00–X09                              | 3           | C1–4                               |
| Drowning                                                   | W65–W74                              | 3           | C1–5                               |
| Accidental mechanical asphyxia                             | W75–W77, W81–W84                     | 3           | C1–6                               |
| Electric shock                                             | W85–W87                              | 3           | C1–7                               |
| Struck by thrown, projected or falling object(s)           | W20                                  | 3           | C1–8                               |
| Contact with sharp object(s)                               | W25–W31                              | 3           | C1–9                               |
| Exposure to forces of nature                               | X30–X39                              | 3           | C1–10                              |
| Intentional injuries                                       | X60–Y09, Y35–Y36, Y87.0, Y87.1       | 2           | C2                                 |
| Intentional self-harm and sequelae                         | X60–X84, Y87.0                       | 3           | C2–1                               |
| Assault and sequelae                                       | X85–Y09, Y87.1                       | 3           | C2–2                               |
| Operations of war                                          | Y36                                  | 3           | C2–3                               |

**Table S2.** Co-linear results for economic status, education level, and health investment indicators.

| Indicators | GDP per capita | Illiteracy**<br>rate |  | health beds per<br>1,000<br>population |  |
|------------|----------------|----------------------|--|----------------------------------------|--|
| VIF*       | 3.17           | 2.36                 |  | 2.29                                   |  |

  

| Indicators | GDP per capita | illiteracy<br>rate |  | health<br>personnel per<br>1,000<br>population |  |
|------------|----------------|--------------------|--|------------------------------------------------|--|
| VIF        | 4.68           | 2.51               |  | 4.70                                           |  |

  

| Indicators | GDP per capita | education<br>expenditure<br>per capita |  | health beds per<br>1,000<br>population |  |
|------------|----------------|----------------------------------------|--|----------------------------------------|--|
| VIF        | <b>12.36</b>   | <b>42.98</b>                           |  | <b>16.34</b>                           |  |

  

| Indicators | GDP per capita | education<br>expenditure<br>per capita |  | health<br>personnel per<br>1,000<br>population |  |
|------------|----------------|----------------------------------------|--|------------------------------------------------|--|
| VIF        | 6.14           | <b>27.14</b>                           |  | <b>19.33</b>                                   |  |

  

| Indicators | GDP per capita | urbanization<br>rate | illiteracy<br>rate | health beds per<br>1,000<br>population |  |
|------------|----------------|----------------------|--------------------|----------------------------------------|--|
| VIF        | <b>13.05</b>   | <b>11.57</b>         | 2.93               | 2.97                                   |  |

  

| Indicators | GDP per capita | illiteracy<br>rate |  | education<br>expenditure<br>per capita | health beds per<br>1,000<br>population |
|------------|----------------|--------------------|--|----------------------------------------|----------------------------------------|
| VIF        | <b>24.97</b>   | 3.72               |  | <b>65.86</b>                           | <b>25.60</b>                           |

  

| Indicators | GDP per capita | illiteracy<br>rate |  | health<br>personnel per<br>1,000<br>population | health beds per<br>1,000<br>population |
|------------|----------------|--------------------|--|------------------------------------------------|----------------------------------------|
| VIF        | 7.73           | 2.92               |  | <b>50.25</b>                                   | <b>24.59</b>                           |

  

| Indicators | GDP per capita | urbanization<br>rate | illiteracy<br>rate | education<br>expenditure<br>per capita | health<br>personnel per<br>1,000<br>population | health beds per<br>1,000<br>population |
|------------|----------------|----------------------|--------------------|----------------------------------------|------------------------------------------------|----------------------------------------|
|------------|----------------|----------------------|--------------------|----------------------------------------|------------------------------------------------|----------------------------------------|

|     |              |              |      |              |              |              |
|-----|--------------|--------------|------|--------------|--------------|--------------|
| VIF | <b>40.06</b> | <b>11.82</b> | 6.85 | <b>82.04</b> | <b>59.63</b> | <b>28.74</b> |
|-----|--------------|--------------|------|--------------|--------------|--------------|

**Note:** \*, VIF = Variance Inflation Factor. A VIF value greater than 10 indicates a strong multicollinearity between indicators. \*\*, Illiteracy rate represents the illiteracy rate of population over 15 years old. The bolding indicates the VIF is higher than 10.

**Table S3.** The association between all-cause (AS)MR\* (per 100,000) for adolescents aged 10-24 years and economic status, education level, as well as health investment.

| Model | GDP per capita<br>(thousand<br>Yuan)  | urbanization<br>rate (%)              | Illiteracy rate<br>(%)             | education<br>expenditure<br>per capita<br>(thousand<br>Yuan) | health<br>personnel per<br>1,000<br>population | health beds<br>per 1,000<br>population |
|-------|---------------------------------------|---------------------------------------|------------------------------------|--------------------------------------------------------------|------------------------------------------------|----------------------------------------|
| 1     | <b>-0.47</b><br><b>(-0.54, -0.41)</b> |                                       |                                    |                                                              |                                                |                                        |
| 2     |                                       | <b>-1.44</b><br><b>(-1.59, -1.30)</b> |                                    |                                                              |                                                |                                        |
| 3     |                                       |                                       | <b>3.27</b><br><b>(2.54, 4.00)</b> |                                                              |                                                |                                        |
| 4     |                                       |                                       |                                    | <b>-10.93</b><br><b>(-11.97, -9.88)</b>                      |                                                |                                        |
| 5     |                                       |                                       |                                    |                                                              | <b>-5.09</b><br><b>(-5.62, -4.57)</b>          |                                        |
| 6     |                                       |                                       |                                    |                                                              |                                                | <b>-6.77</b><br><b>(-7.45, -6.08)</b>  |
| 7     | <b>-0.38</b><br><b>(-0.48, -0.28)</b> |                                       | <b>0.94</b><br><b>(0.14, 1.74)</b> |                                                              |                                                |                                        |
| 8     | -0.10<br>(-0.23, 0.03)                |                                       |                                    |                                                              |                                                | <b>-5.50</b><br><b>(-7.29, -3.71)</b>  |
| 9     |                                       |                                       | 0.41<br>(-0.25, 1.07)              |                                                              |                                                | <b>-6.19</b><br><b>(-7.34, -5.04)</b>  |
| 10    | -0.09<br>(-0.22, 0.04)                |                                       | 0.33<br>(-0.33, 1.00)              |                                                              |                                                | <b>-5.18</b><br><b>(-7.08, -3.27)</b>  |
| 11    | <b>0.35</b><br><b>(0.04, 0.66)</b>    | -1.93<br>(-4.41, 0.56)                | -0.73<br>(-1.84, 0.37)             | <b>-12.15</b><br><b>(-22.76, -1.53)</b>                      | 0.34<br>(-3.18, 3.85)                          | 3.73<br>(-5.74, 13.19)                 |

Note: \*, (AS)MR = (age-standardized) mortality rate. The bolding indicates a statistically significant association.

**Table S4.** The association between all-cause (AS)MR\* (per 100,000) for adolescents aged 10 to 24 years and one-year-lagged economic status, education level, as well as health investment in different subgroups.

| Group           | GDP per capita<br>(thousand Yuan) | Illiteracy rate (%)            | health beds per<br>1,000 population |
|-----------------|-----------------------------------|--------------------------------|-------------------------------------|
| Country         | -0.10<br>(-0.24, 0.04)            | 0.36<br>(-0.30, 1.03)          | <b>-5.21</b><br>(-7.19, -3.23)      |
| Gender          |                                   |                                |                                     |
| Male            | <b>-0.23</b><br>(-0.40, -0.07)    | 0.01<br>(-0.78, 0.80)          | <b>-6.40</b><br>(-8.76, -4.04)      |
| Female          | 0.02<br>(-0.11, 0.15)             | <b>0.75</b><br>(0.13, 1.37)    | <b>-3.69</b><br>(-5.54, -1.85)      |
| Area            |                                   |                                |                                     |
| Urban           | -0.08<br>(-0.24, 0.08)            | 0.32<br>(-0.45, 1.08)          | <b>-3.99</b><br>(-6.27, -1.71)      |
| Rural           | <b>-0.21</b><br>(-0.37, -0.04)    | 0.18<br>(-0.60, 0.97)          | <b>-4.57</b><br>(-6.91, -2.22)      |
| Age group       |                                   |                                |                                     |
| 10 to 14        | -0.01<br>(-0.15, 0.12)            | <b>-0.74</b><br>(-1.39, -0.10) | <b>-1.99</b><br>(-3.90, -0.07)      |
| 15 to 19        | -0.06<br>(-0.23, 0.11)            | <b>1.09</b><br>(0.27, 1.92)    | <b>-3.63</b><br>(-6.09, -1.18)      |
| 20 to 24        | -0.19<br>(-0.40, 0.02)            | 0.44<br>(-0.57, 1.45)          | <b>-8.34</b><br>(-11.35, -5.34)     |
| Cause of death  |                                   |                                |                                     |
| CMNN diseases** | <b>0.05</b><br>(0.02, 0.07)       | <b>0.28</b><br>(0.16, 0.40)    | <b>-0.77</b><br>(-1.14, -0.41)      |
| NCDs***         | -0.01<br>(-0.05, 0.04)            | <b>0.26</b><br>(0.05, 0.47)    | <b>-0.99</b><br>(-1.62, -0.35)      |
| Injuries        | <b>-0.14</b><br>(-0.23, -0.05)    | -0.21<br>(-0.62, 0.20)         | <b>-3.48</b><br>(-4.70, -2.27)      |

Note: \*, (AS)MR = (age-standardized) mortality rate; \*\*, CMNN diseases = Communicable, maternal, neonatal, and nutritional diseases; \*\*\*, NCDs = non-communicable diseases. For different Age group, we used MR, while for other groups, we used ASMR. The bolding indicates a statistically significant association.

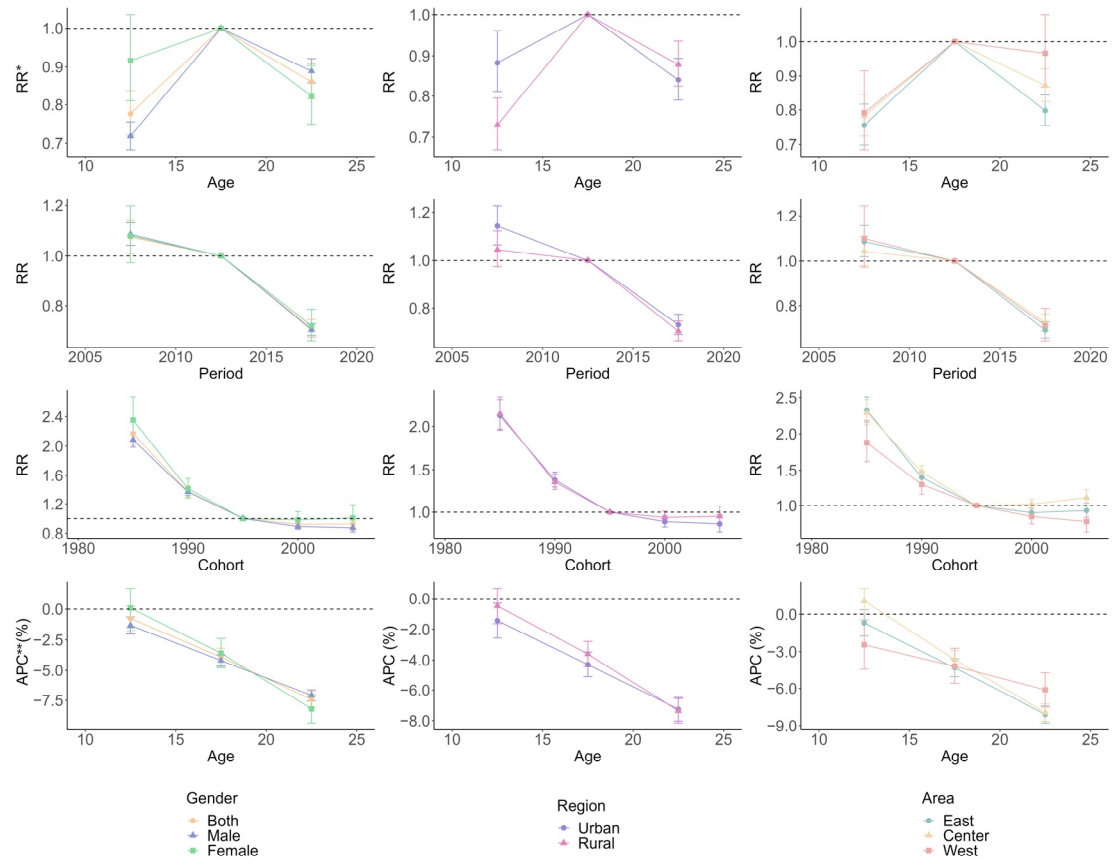

**Figure S1.** Age, period, and cohort trends in mortality in each subgroup, 2005–2019.

Note: \*, RR=Rate Ratio; \*\*, APC = Annual Percentage change. The error bars represent the 95% confidence interval of the estimate.

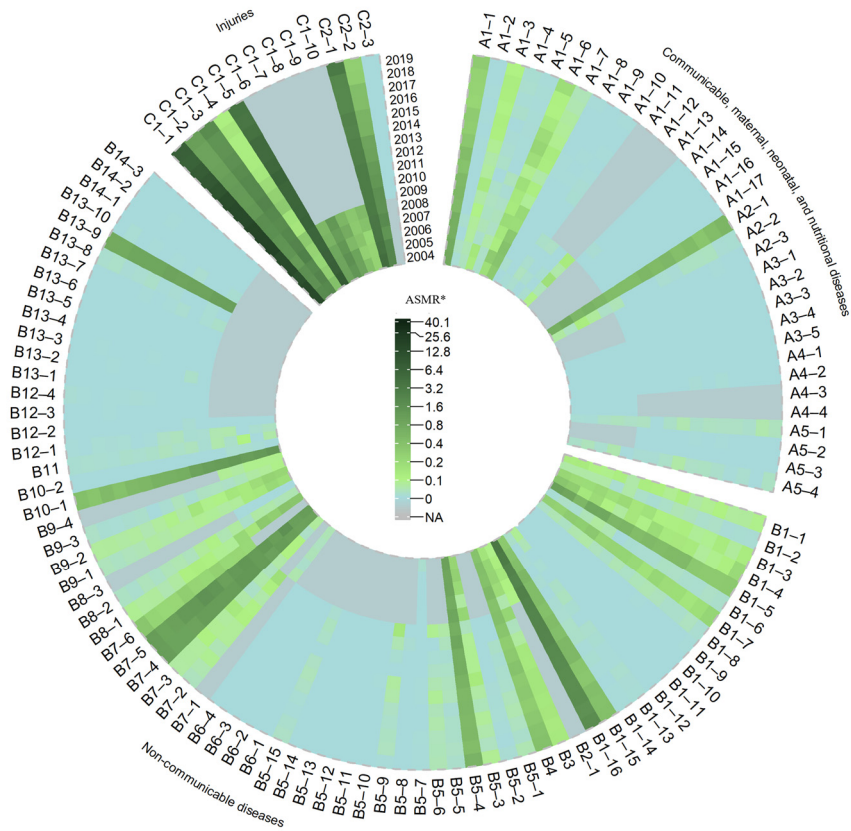

**Figure S2.** The ASMR of male adolescents aged 10 to 24 by cause of death, 2004 to 2019. Note: \*, ASMR = Age standardized mortality rate.

| Leading cause in 2004<br>(ASMR* (per 100,000))                       | Leading cause in 2010<br>(ASMR (per 100,000))                        | Leading cause in 2019<br>(ASMR (per 100,000))                        |
|----------------------------------------------------------------------|----------------------------------------------------------------------|----------------------------------------------------------------------|
| Road injuries<br>(15.40)                                             | Road injuries<br>(18.11)                                             | Road injuries<br>(7.16)                                              |
| Drowning<br>(8.39)                                                   | Drowning<br>(6.17)                                                   | Drowning<br>(4.07)                                                   |
| Intentional self-harm and sequelae<br>(4.95)                         | Intentional self-harm and sequelae<br>(2.97)                         | Intentional self-harm and sequelae<br>(3.18)                         |
| Leukaemia<br>(3.46)                                                  | Leukaemia<br>(2.46)                                                  | Falls<br>(1.94)                                                      |
| Assault and sequelae<br>(2.35)                                       | Falls<br>(1.95)                                                      | Leukaemia<br>(1.88)                                                  |
| Falls<br>(2.19)                                                      | Accidental poisoning by and exposure to noxious substances<br>(1.75) | Cerebrovascular diseases<br>(1.18)                                   |
| Accidental poisoning by and exposure to noxious substances<br>(2.01) | Assault and sequelae<br>(1.38)                                       | Ischemic heart diseases<br>(1.13)                                    |
| Nephritis and kidney disease<br>(1.49)                               | Cerebrovascular diseases<br>(1.37)                                   | Accidental poisoning by and exposure to noxious substances<br>(1.10) |
| Electric shock<br>(1.41)                                             | Ischemic heart diseases<br>(1.34)                                    | Congenital malformations of the circulatory system<br>(0.76)         |
| Cerebrovascular diseases<br>(1.20)                                   | Congenital malformations of the circulatory system<br>(1.09)         | Epilepsy<br>(0.61)                                                   |
| Ischemic heart diseases<br>(1.05)                                    | Nephritis and kidney disease<br>(0.98)                               | Lower respiratory infections<br>(0.55)                               |
| Epilepsy<br>(1.04)                                                   | Epilepsy<br>(0.84)                                                   | Lymphoma and multiple myeloma<br>(0.42)                              |
| Malignant neoplasm of liver and intrahepatic bile ducts<br>(1.04)    | Malignant neoplasm of liver and intrahepatic bile ducts<br>(0.58)    | Nephritis and kidney disease<br>(0.42)                               |
| Accidental mechanical asphyxia<br>(0.96)                             | Tuberculosis<br>(0.50)                                               | Endocrine disorder<br>(0.40)                                         |
| Struck by thrown, projected or falling object(s)<br>(0.93)           | Lower respiratory infections<br>(0.46)                               | Inflammatory heart disease<br>(0.35)                                 |

Class

- Communicable, maternal, neonatal, and nutritional diseases
- Non-communicable diseases
- Injuries

**Figure S3.** The top 15 leading causes of death of male adolescents aged 10 to 24 in 2004, 2010 and 2019. Note: \*, ASMR = Age standardized mortality rate.

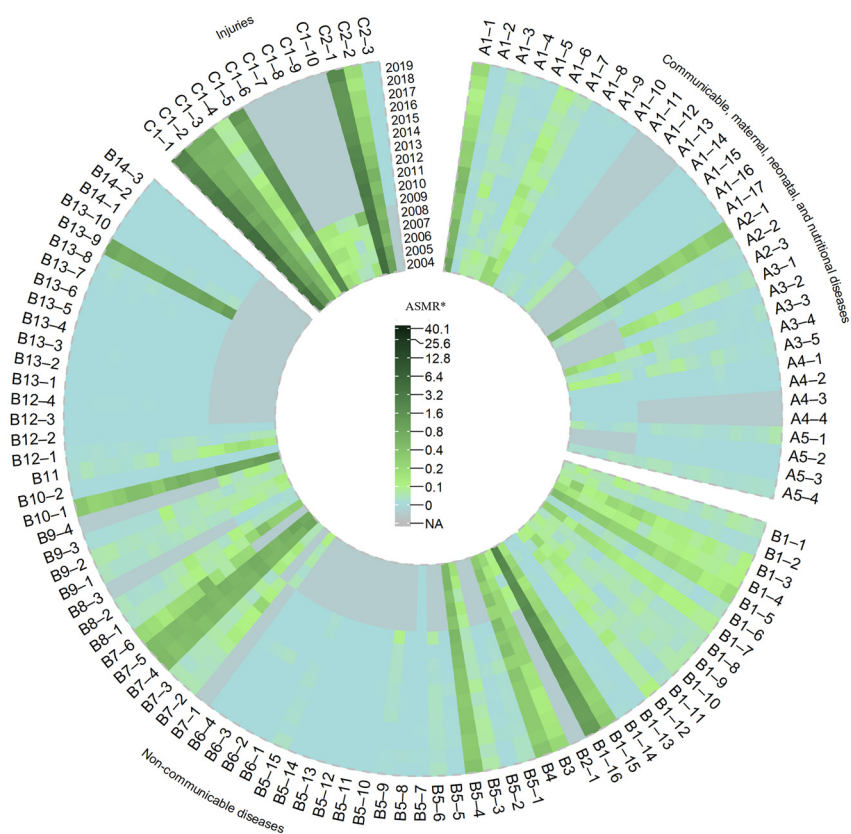

**Figure S4.** The ASMR of female adolescents aged 10 to 24 by cause of death, 2004 to 2019. Note: \*, ASMR = Age standardized mortality rate.

| Leading cause in 2004<br>(ASMR* (per 100,000))                       | Leading cause in 2010<br>(ASMR (per 100,000))                        | Leading cause in 2019<br>(ASMR (per 100,000))                        |
|----------------------------------------------------------------------|----------------------------------------------------------------------|----------------------------------------------------------------------|
| Intentional self-harm and sequelae<br>(4.86)                         | Road injuries<br>(5.18)                                              | Road injuries<br>(2.51)                                              |
| Road injuries<br>(4.30)                                              | Intentional self-harm and sequelae<br>(3.17)                         | Intentional self-harm and sequelae<br>(2.09)                         |
| Leukaemia<br>(2.53)                                                  | Leukaemia<br>(1.65)                                                  | Drowning<br>(1.39)                                                   |
| Drowning<br>(2.13)                                                   | Drowning<br>(1.39)                                                   | Leukaemia<br>(1.25)                                                  |
| Accidental poisoning by and exposure to noxious substances<br>(1.51) | Accidental poisoning by and exposure to noxious substances<br>(0.97) | Congenital malformations of the circulatory system<br>(0.80)         |
| Nephritis and kidney disease<br>(1.21)                               | Congenital malformations of the circulatory system<br>(0.79)         | Falls<br>(0.74)                                                      |
| Assault and sequelae<br>(1.04)                                       | Cerebrovascular diseases<br>(0.61)                                   | Accidental poisoning by and exposure to noxious substances<br>(0.70) |
| Tuberculosis<br>(0.93)                                               | Nephritis and kidney disease<br>(0.55)                               | Ischemic heart diseases<br>(0.51)                                    |
| Ischemic heart diseases<br>(0.87)                                    | Ischemic heart diseases<br>(0.55)                                    | Cerebrovascular diseases<br>(0.49)                                   |
| Cerebrovascular diseases<br>(0.75)                                   | Tuberculosis<br>(0.55)                                               | Epilepsy<br>(0.39)                                                   |
| Falls<br>(0.59)                                                      | Falls<br>(0.47)                                                      | Endocrine disorder<br>(0.37)                                         |
| Lower respiratory infections<br>(0.57)                               | Epilepsy<br>(0.46)                                                   | Lower respiratory infections<br>(0.35)                               |
| Epilepsy<br>(0.52)                                                   | Assault and sequelae<br>(0.44)                                       | Nephritis and kidney disease<br>(0.35)                               |
| Malignant neoplasm of liver and intrahepatic bile ducts<br>(0.43)    | Lower respiratory infections<br>(0.40)                               | Lymphoma and multiple myeloma<br>(0.31)                              |
| Endocrine disorder<br>(0.32)                                         | Endocrine disorder<br>(0.34)                                         | Tuberculosis<br>(0.21)                                               |

Class 
 ■ Communicable, maternal, neonatal, and nutritional diseases
 ■ Non-communicable diseases
 ■ Injuries

**Figure S5.** The top 15 leading causes of death of female adolescents aged 10 to 24 in 2004, 2010 and 2019. Note: \*, ASMR = Age standardized mortality rate.

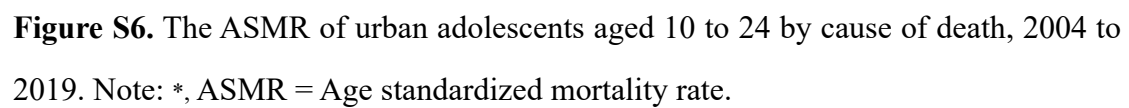

| Leading cause in 2004<br>(ASMR* (per 100,000))                       | Leading cause in 2010<br>(ASMR (per 100,000))                        | Leading cause in 2019<br>(ASMR (per 100,000))                        |
|----------------------------------------------------------------------|----------------------------------------------------------------------|----------------------------------------------------------------------|
| Road injuries<br>(6.69)                                              | Road injuries<br>(8.90)                                              | Road injuries<br>(3.74)                                              |
| Drowning<br>(3.91)                                                   | Drowning<br>(2.58)                                                   | Intentional self-harm and sequelae<br>(2.47)                         |
| Intentional self-harm and sequelae<br>(3.59)                         | Intentional self-harm and sequelae<br>(2.49)                         | Drowning<br>(2.13)                                                   |
| Leukaemia<br>(2.52)                                                  | Leukaemia<br>(1.92)                                                  | Falls<br>(1.33)                                                      |
| Assault and sequelae<br>(1.98)                                       | Falls<br>(1.20)                                                      | Leukaemia<br>(1.28)                                                  |
| Accidental poisoning by and exposure to noxious substances<br>(1.44) | Accidental poisoning by and exposure to noxious substances<br>(1.14) | Congenital malformations of the circulatory system<br>(0.73)         |
| Nephritis and kidney disease<br>(1.12)                               | Assault and sequelae<br>(1.00)                                       | Accidental poisoning by and exposure to noxious substances<br>(0.72) |
| Falls<br>(0.96)                                                      | Congenital malformations of the circulatory system<br>(0.88)         | Ischemic heart diseases<br>(0.72)                                    |
| Cerebrovascular diseases<br>(0.80)                                   | Ischemic heart diseases<br>(0.85)                                    | Cerebrovascular diseases<br>(0.64)                                   |
| Ischemic heart diseases<br>(0.74)                                    | Cerebrovascular diseases<br>(0.82)                                   | Epilepsy<br>(0.42)                                                   |
| Electric shock<br>(0.47)                                             | Nephritis and kidney disease<br>(0.59)                               | Lower respiratory infections<br>(0.40)                               |
| Epilepsy<br>(0.39)                                                   | Epilepsy<br>(0.57)                                                   | Lymphoma and multiple myeloma<br>(0.33)                              |
| Endocrine disorder<br>(0.36)                                         | Lymphoma and multiple myeloma<br>(0.41)                              | Endocrine disorder<br>(0.32)                                         |
| Tuberculosis<br>(0.35)                                               | Endocrine disorder<br>(0.40)                                         | Nephritis and kidney disease<br>(0.28)                               |
| Malignant neoplasm of liver and intrahepatic bile ducts<br>(0.31)    | Lower respiratory infections<br>(0.36)                               | Inflammatory heart disease<br>(0.27)                                 |

Class
   
■ Communicable, maternal, neonatal, and nutritional diseases
   
■ Non-communicable diseases
   
■ Injuries

**Figure S7.** The top 15 leading causes of death of urban adolescents aged 10 to 24 in 2004, 2010 and 2019. Note: \*, ASMR = Age standardized mortality rate.

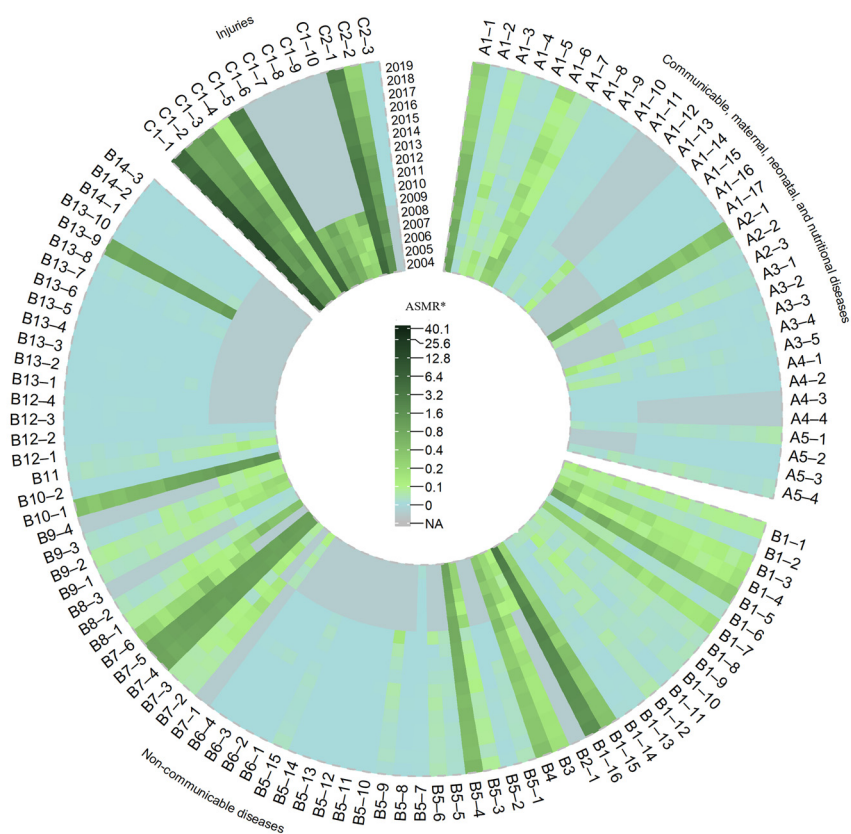

**Figure S8.** The ASMR of rural adolescents aged 10 to 24 by cause of death, 2004 to 2019. Note: \*, ASMR = Age standardized mortality rate.

| Leading cause in 2004<br>(ASMR* (per 100,000))                       | Leading cause in 2010<br>(ASMR* (per 100,000))                       | Leading cause in 2019<br>(ASMR* (per 100,000))                       |
|----------------------------------------------------------------------|----------------------------------------------------------------------|----------------------------------------------------------------------|
| Road injuries<br>(11.56)                                             | Road injuries<br>(13.25)                                             | Road injuries<br>(5.57)                                              |
| Drowning<br>(6.02)                                                   | Drowning<br>(4.60)                                                   | Drowning<br>(3.12)                                                   |
| Intentional self-harm and sequelae<br>(5.55)                         | Intentional self-harm and sequelae<br>(3.34)                         | Intentional self-harm and sequelae<br>(2.76)                         |
| Leukaemia<br>(3.24)                                                  | Leukaemia<br>(2.14)                                                  | Leukaemia<br>(1.73)                                                  |
| Accidental poisoning by and exposure to noxious substances<br>(1.92) | Accidental poisoning by and exposure to noxious substances<br>(1.49) | Falls<br>(1.39)                                                      |
| Falls<br>(1.62)                                                      | Falls<br>(1.27)                                                      | Accidental poisoning by and exposure to noxious substances<br>(1.00) |
| Assault and sequelae<br>(1.59)                                       | Cerebrovascular diseases<br>(1.09)                                   | Cerebrovascular diseases<br>(0.96)                                   |
| Nephritis and kidney disease<br>(1.46)                               | Ischemic heart diseases<br>(1.01)                                    | Ischemic heart diseases<br>(0.90)                                    |
| Tuberculosis<br>(1.11)                                               | Congenital malformations of the circulatory system<br>(0.98)         | Congenital malformations of the circulatory system<br>(0.80)         |
| Ischemic heart diseases<br>(1.07)                                    | Assault and sequelae<br>(0.91)                                       | Epilepsy<br>(0.56)                                                   |
| Cerebrovascular diseases<br>(1.07)                                   | Nephritis and kidney disease<br>(0.86)                               | Lower respiratory infections<br>(0.48)                               |
| Epilepsy<br>(0.97)                                                   | Epilepsy<br>(0.71)                                                   | Nephritis and kidney disease<br>(0.44)                               |
| Malignant neoplasm of liver and intrahepatic bile ducts<br>(0.96)    | Tuberculosis<br>(0.65)                                               | Endocrine disorder<br>(0.41)                                         |
| Electric shock<br>(0.93)                                             | Malignant neoplasm of liver and intrahepatic bile ducts<br>(0.49)    | Lymphoma and multiple myeloma<br>(0.39)                              |
| Lower respiratory infections<br>(0.81)                               | Lower respiratory infections<br>(0.47)                               | Malignant neoplasm of liver and intrahepatic bile ducts<br>(0.32)    |

Class
 ■ Communicable, maternal, neonatal, and nutritional diseases
 ■ Non-communicable diseases
 ■ Injuries

**Figure S9.** The top 15 leading causes of death of rural adolescents aged 10 to 24 in 2004, 2010 and 2019. Note: \*, ASMR = Age standardized mortality rate.

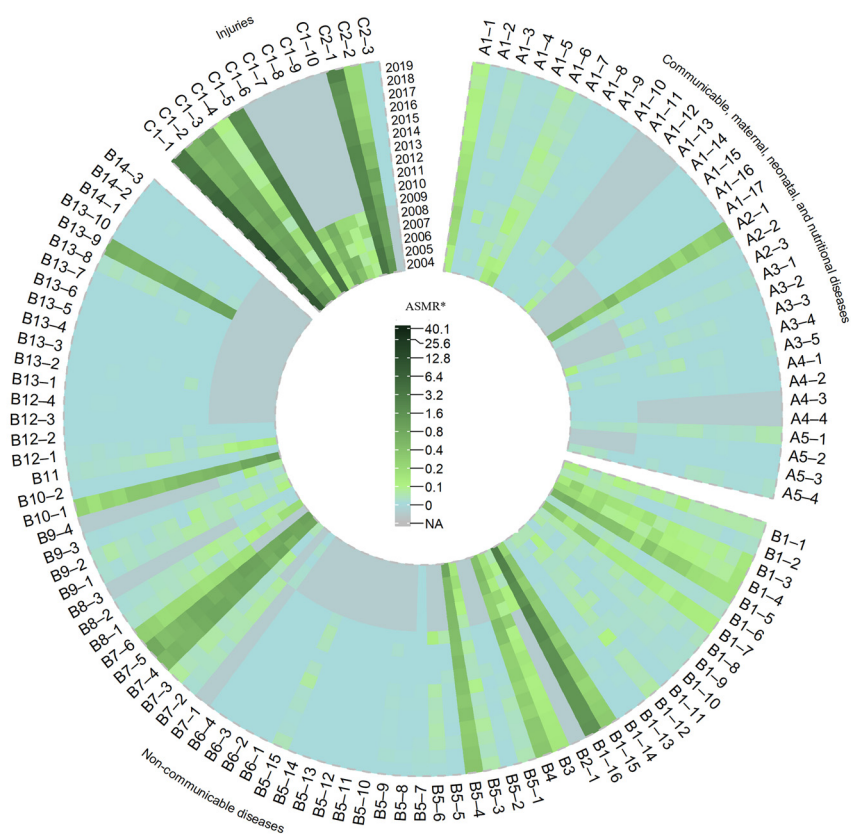

**Figure S10.** The ASMR of eastern adolescents aged 10 to 24 by cause of death, 2004 to 2019. Note: \*, ASMR = Age standardized mortality rate.

| Leading cause in 2004<br>(ASMR* (per 100,000))                       | Leading cause in 2010<br>(ASMR (per 100,000))                        | Leading cause in 2019<br>(ASMR (per 100,000))                        |
|----------------------------------------------------------------------|----------------------------------------------------------------------|----------------------------------------------------------------------|
| Road injuries<br>(9.58)                                              | Road injuries<br>(11.18)                                             | Road injuries<br>(3.63)                                              |
| Drowning<br>(4.38)                                                   | Drowning<br>(3.26)                                                   | Intentional self-harm and sequelae<br>(2.54)                         |
| Intentional self-harm and sequelae<br>(3.77)                         | Intentional self-harm and sequelae<br>(2.21)                         | Drowning<br>(1.99)                                                   |
| Leukaemia<br>(2.95)                                                  | Leukaemia<br>(1.99)                                                  | Leukaemia<br>(1.57)                                                  |
| Accidental poisoning by and exposure to noxious substances<br>(1.70) | Cerebrovascular diseases<br>(1.04)                                   | Falls<br>(1.03)                                                      |
| Assault and sequelae<br>(1.46)                                       | Congenital malformations of the circulatory system<br>(0.95)         | Cerebrovascular diseases<br>(0.76)                                   |
| Falls<br>(1.27)                                                      | Falls<br>(0.83)                                                      | Congenital malformations of the circulatory system<br>(0.66)         |
| Nephritis and kidney disease<br>(1.21)                               | Ischemic heart diseases<br>(0.78)                                    | Accidental poisoning by and exposure to noxious substances<br>(0.59) |
| Cerebrovascular diseases<br>(1.02)                                   | Accidental poisoning by and exposure to noxious substances<br>(0.72) | Ischemic heart diseases<br>(0.51)                                    |
| Epilepsy<br>(0.83)                                                   | Assault and sequelae<br>(0.67)                                       | Lower respiratory infections<br>(0.38)                               |
| Ischemic heart diseases<br>(0.82)                                    | Nephritis and kidney disease<br>(0.46)                               | Epilepsy<br>(0.37)                                                   |
| Electric shock<br>(0.80)                                             | Epilepsy<br>(0.40)                                                   | Endocrine disorder<br>(0.35)                                         |
| Malignant neoplasm of liver and intrahepatic bile ducts<br>(0.58)    | Endocrine disorder<br>(0.40)                                         | Lymphoma and multiple myeloma<br>(0.31)                              |
| Lower respiratory infections<br>(0.46)                               | Lymphoma and multiple myeloma<br>(0.35)                              | Inflammatory heart disease<br>(0.28)                                 |
| Endocrine disorder<br>(0.41)                                         | Malignant neoplasm of liver and intrahepatic bile ducts<br>(0.33)    | Nephritis and kidney disease<br>(0.26)                               |

Class

- Communicable, maternal, neonatal, and nutritional diseases
- Non-communicable diseases
- Injuries

**Figure S11.** The top 15 leading causes of death of eastern adolescents aged 10 to 24 in 2004, 2010 and 2019. Note: \*, ASMR = Age standardized mortality rate.

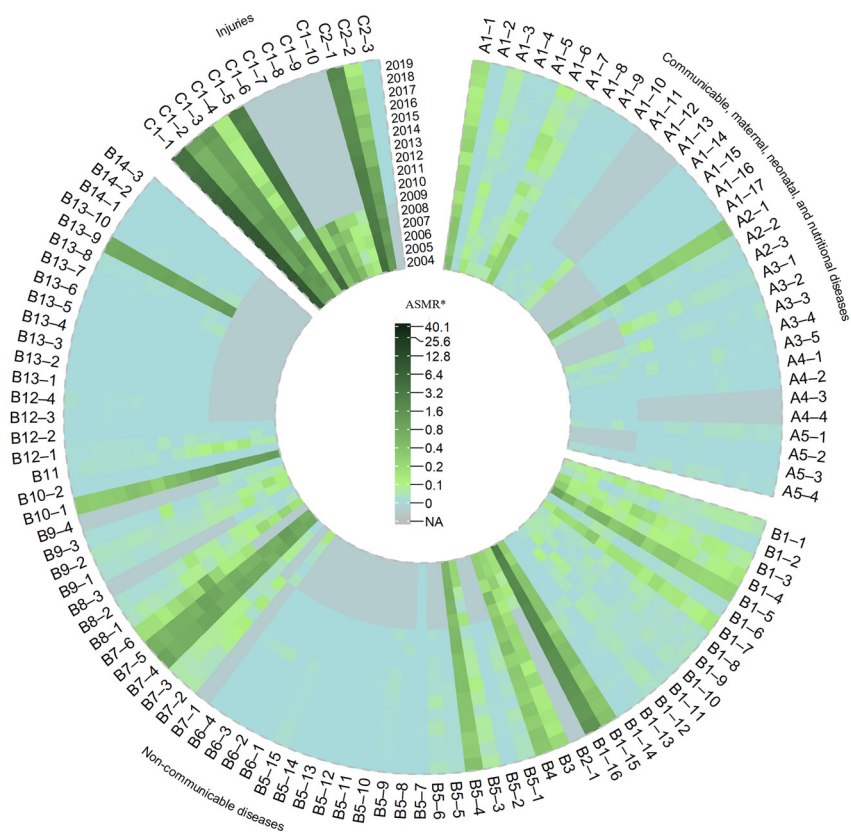

**Figure S12.** The ASMR of central adolescents aged 10 to 24 by cause of death, 2004 to 2019. Note: \*, ASMR = Age standardized mortality rate.

| Leading cause in 2004<br>(ASMR* (per 100,000))                       | Leading cause in 2010<br>(ASMR* (per 100,000))                       | Leading cause in 2019<br>(ASMR* (per 100,000))                       |
|----------------------------------------------------------------------|----------------------------------------------------------------------|----------------------------------------------------------------------|
| Road injuries<br>(8.80)                                              | Road injuries<br>(10.10)                                             | Road injuries<br>(4.41)                                              |
| Drowning<br>(5.27)                                                   | Drowning<br>(4.26)                                                   | Drowning<br>(2.96)                                                   |
| Intentional self-harm and sequelae<br>(4.92)                         | Intentional self-harm and sequelae<br>(2.80)                         | Intentional self-harm and sequelae<br>(2.25)                         |
| Leukaemia<br>(2.84)                                                  | Leukaemia<br>(2.11)                                                  | Leukaemia<br>(1.56)                                                  |
| Assault and sequelae<br>(1.29)                                       | Falls<br>(1.47)                                                      | Falls<br>(1.30)                                                      |
| Accidental poisoning by and exposure to noxious substances<br>(1.28) | Accidental poisoning by and exposure to noxious substances<br>(1.23) | Ischemic heart diseases<br>(0.94)                                    |
| Falls<br>(1.25)                                                      | Congenital malformations of the circulatory system<br>(1.12)         | Accidental poisoning by and exposure to noxious substances<br>(0.93) |
| Nephritis and kidney disease<br>(1.24)                               | Assault and sequelae<br>(0.82)                                       | Congenital malformations of the circulatory system<br>(0.75)         |
| Malignant neoplasm of liver and intrahepatic bile ducts<br>(0.89)    | Ischemic heart diseases<br>(0.76)                                    | Cerebrovascular diseases<br>(0.65)                                   |
| Ischemic heart diseases<br>(0.82)                                    | Nephritis and kidney disease<br>(0.75)                               | Epilepsy<br>(0.40)                                                   |
| Electric shock<br>(0.79)                                             | Cerebrovascular diseases<br>(0.56)                                   | Lymphoma and multiple myeloma<br>(0.39)                              |
| Cerebrovascular diseases<br>(0.66)                                   | Epilepsy<br>(0.55)                                                   | Lower respiratory infections<br>(0.35)                               |
| Epilepsy<br>(0.57)                                                   | Lower respiratory infections<br>(0.45)                               | Endocrine disorder<br>(0.34)                                         |
| Struck by thrown, projected or falling object(s)<br>(0.47)           | Lymphoma and multiple myeloma<br>(0.39)                              | Nephritis and kidney disease<br>(0.33)                               |
| Tuberculosis<br>(0.47)                                               | Malignant neoplasm of liver and intrahepatic bile ducts<br>(0.37)    | Malignant neoplasm of liver and intrahepatic bile ducts<br>(0.24)    |

Class 
 ■ Communicable, maternal, neonatal, and nutritional diseases
 ■ Non-communicable diseases
 ■ Injuries

**Figure S13.** The top 15 leading causes of death of central adolescents aged 10 to 24 in 2004, 2010 and 2019. Note: \*, ASMR = Age standardized mortality rate.

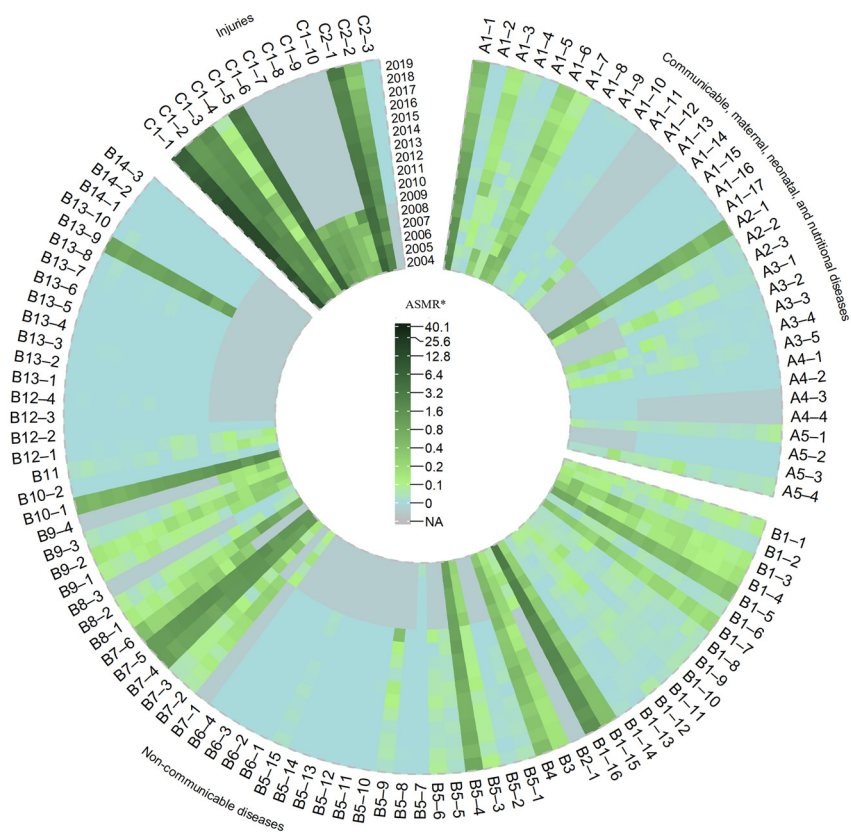

**Figure S14.** The ASMR of western adolescents aged 10 to 24 by cause of death, 2004 to 2019. Note: \*, ASMR = Age standardized mortality rate.

| Leading cause in 2004<br>(ASMR* (per 100,000))                       | Leading cause in 2010<br>(ASMR (per 100,000))                        | Leading cause in 2019<br>(ASMR (per 100,000))                        |
|----------------------------------------------------------------------|----------------------------------------------------------------------|----------------------------------------------------------------------|
| Road injuries<br>(11.86)                                             | Road injuries<br>(15.04)                                             | Road injuries<br>(7.32)                                              |
| Drowning<br>(6.64)                                                   | Intentional self-harm and sequelae<br>(4.46)                         | Drowning<br>(3.61)                                                   |
| Intentional self-harm and sequelae<br>(6.30)                         | Drowning<br>(4.36)                                                   | Intentional self-harm and sequelae<br>(3.30)                         |
| Leukaemia<br>(3.28)                                                  | Accidental poisoning by and exposure to noxious substances<br>(2.39) | Falls<br>(1.89)                                                      |
| Assault and sequelae<br>(2.52)                                       | Leukaemia<br>(2.14)                                                  | Leukaemia<br>(1.67)                                                  |
| Accidental poisoning by and exposure to noxious substances<br>(2.46) | Cerebrovascular diseases<br>(1.50)                                   | Accidental poisoning by and exposure to noxious substances<br>(1.28) |
| Tuberculosis<br>(2.23)                                               | Falls<br>(1.46)                                                      | Cerebrovascular diseases<br>(1.21)                                   |
| Falls<br>(1.78)                                                      | Ischemic heart diseases<br>(1.43)                                    | Ischemic heart diseases<br>(1.14)                                    |
| Nephritis and kidney disease<br>(1.67)                               | Assault and sequelae<br>(1.41)                                       | Congenital malformations of the circulatory system<br>(0.96)         |
| Accidental mechanical asphyxia<br>(1.33)                             | Tuberculosis<br>(1.29)                                               | Epilepsy<br>(0.80)                                                   |
| Cerebrovascular diseases<br>(1.33)                                   | Nephritis and kidney disease<br>(1.18)                               | Lower respiratory infections<br>(0.66)                               |
| Ischemic heart diseases<br>(1.31)                                    | Epilepsy<br>(1.13)                                                   | Nephritis and kidney disease<br>(0.61)                               |
| Lower respiratory infections<br>(1.16)                               | Congenital malformations of the circulatory system<br>(0.74)         | Tuberculosis<br>(0.56)                                               |
| Epilepsy<br>(1.01)                                                   | Lower respiratory infections<br>(0.63)                               | Endocrine disorder<br>(0.46)                                         |
| Electric shock<br>(0.77)                                             | Malignant neoplasm of liver and intrahepatic bile ducts<br>(0.58)    | Lymphoma and multiple myeloma<br>(0.42)                              |

Class
 ■ Communicable, maternal, neonatal, and nutritional diseases
 ■ Non-communicable diseases
 ■ Injuries

**Figure S15.** The top 15 leading causes of death of western adolescents aged 10 to 24 in 2004, 2010 and 2019. Note: \*, ASMR = Age standardized mortality rate.

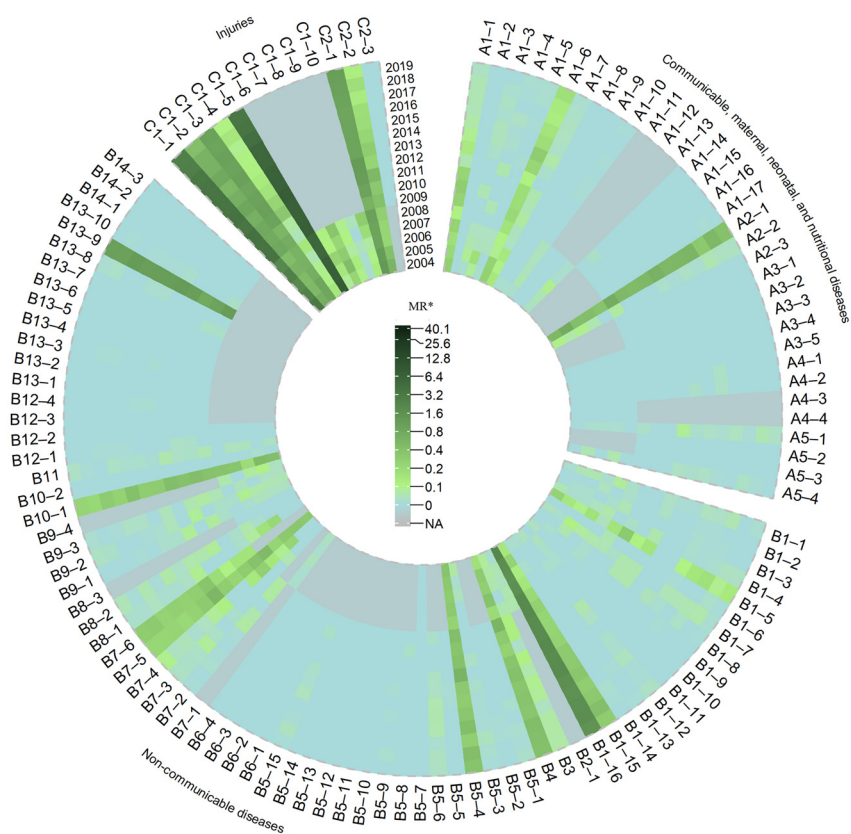

**Figure S16.** The ASMR of adolescents aged 10 to 14 by cause of death, 2004 to 2019.

Note: \*, MR = Mortality rate.

| Leading cause in 2004<br>(MR* (per 100,000))                         | Leading cause in 2010<br>(MR (per 100,000))                          | Leading cause in 2019<br>(MR (per 100,000))                          |
|----------------------------------------------------------------------|----------------------------------------------------------------------|----------------------------------------------------------------------|
| Drowning<br>(8.16)                                                   | Drowning<br>(6.79)                                                   | Drowning<br>(3.52)                                                   |
| Road injuries<br>(3.18)                                              | Road injuries<br>(4.00)                                              | Road injuries<br>(2.73)                                              |
| Leukaemia<br>(2.27)                                                  | Leukaemia<br>(1.96)                                                  | Leukaemia<br>(1.53)                                                  |
| Intentional self-harm and sequelae<br>(1.33)                         | Intentional self-harm and sequelae<br>(0.97)                         | Intentional self-harm and sequelae<br>(1.11)                         |
| Falls<br>(0.82)                                                      | Congenital malformations of the circulatory system<br>(0.94)         | Congenital malformations of the circulatory system<br>(1.08)         |
| Accidental poisoning by and exposure to noxious substances<br>(0.68) | Accidental poisoning by and exposure to noxious substances<br>(0.74) | Falls<br>(0.99)                                                      |
| Assault and sequelae<br>(0.59)                                       | Falls<br>(0.56)                                                      | Accidental poisoning by and exposure to noxious substances<br>(0.41) |
| Lower respiratory infections<br>(0.51)                               | Lower respiratory infections<br>(0.49)                               | Endocrine disorder<br>(0.40)                                         |
| Nephritis and kidney disease<br>(0.44)                               | Nephritis and kidney disease<br>(0.43)                               | Lower respiratory infections<br>(0.39)                               |
| Epilepsy<br>(0.37)                                                   | Epilepsy<br>(0.36)                                                   | Epilepsy<br>(0.37)                                                   |
| Cerebrovascular diseases<br>(0.33)                                   | Assault and sequelae<br>(0.34)                                       | Lymphoma and multiple myeloma<br>(0.30)                              |
| Meningitis<br>(0.26)                                                 | Malignant neoplasm of liver and intrahepatic bile ducts<br>(0.31)    | Inflammatory heart disease<br>(0.29)                                 |
| Tuberculosis<br>(0.26)                                               | Endocrine disorder<br>(0.31)                                         | Nephritis and kidney disease<br>(0.24)                               |
| Malignant neoplasm of liver and intrahepatic bile ducts<br>(0.25)    | Cerebrovascular diseases<br>(0.29)                                   | Cerebrovascular diseases<br>(0.21)                                   |
| Electric shock<br>(0.23)                                             | Tuberculosis<br>(0.29)                                               | Meningitis<br>(0.17)                                                 |

Class 
 ■ Communicable, maternal, neonatal, and nutritional diseases
 ■ Non-communicable diseases
 ■ Injuries

**Figure S17.** The top 15 leading causes of death of adolescents aged 10 to 14 in 2004, 2010 and 2019. Note: \*, MR = Mortality rate.

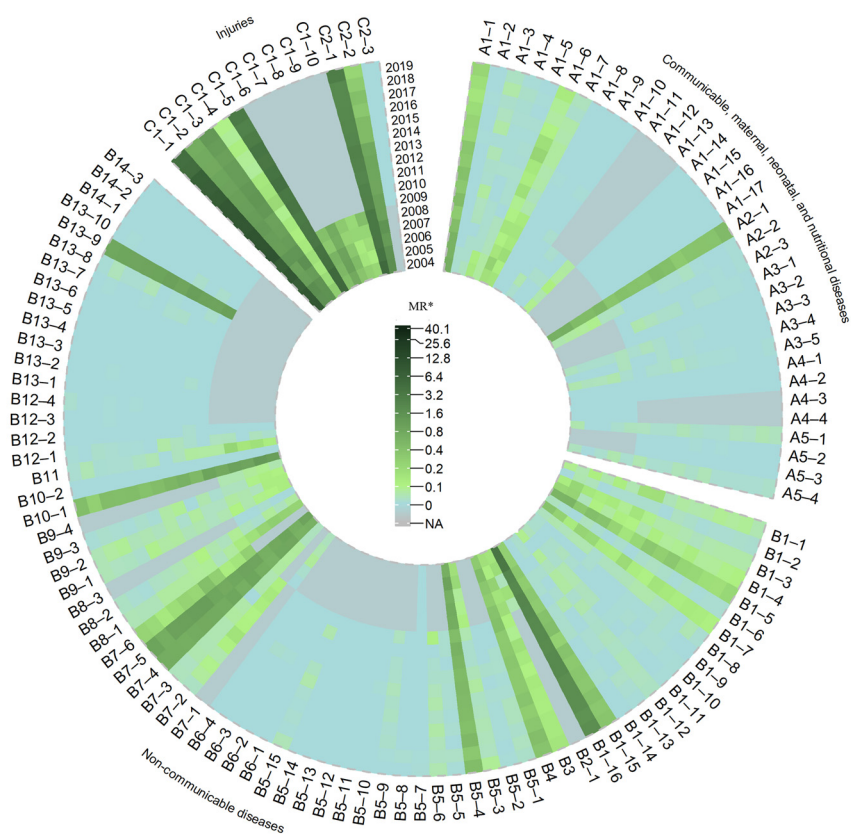

**Figure S18.** The ASMR of adolescents aged 15 to 19 by cause of death, 2004 to 2019.

Note: \*, MR = Mortality rate.

| Leading cause in 2004<br>(MR* (per 100,000))                         | Leading cause in 2010<br>(MR (per 100,000))                          | Leading cause in 2019<br>(MR (per 100,000))                          |
|----------------------------------------------------------------------|----------------------------------------------------------------------|----------------------------------------------------------------------|
| Road injuries<br>(9.78)                                              | Road injuries<br>(10.70)                                             | Road injuries<br>(4.74)                                              |
| Intentional self-harm and sequelae<br>(5.44)                         | Drowning<br>(3.26)                                                   | Drowning<br>(3.11)                                                   |
| Drowning<br>(5.35)                                                   | Intentional self-harm and sequelae<br>(2.62)                         | Intentional self-harm and sequelae<br>(2.93)                         |
| Leukaemia<br>(3.73)                                                  | Leukaemia<br>(2.13)                                                  | Leukaemia<br>(1.81)                                                  |
| Assault and sequelae<br>(1.71)                                       | Accidental poisoning by and exposure to noxious substances<br>(1.13) | Falls<br>(1.34)                                                      |
| Accidental poisoning by and exposure to noxious substances<br>(1.61) | Falls<br>(1.05)                                                      | Cerebrovascular diseases<br>(0.90)                                   |
| Falls<br>(1.54)                                                      | Cerebrovascular diseases<br>(0.93)                                   | Congenital malformations of the circulatory system<br>(0.82)         |
| Nephritis and kidney disease<br>(1.10)                               | Congenital malformations of the circulatory system<br>(0.93)         | Accidental poisoning by and exposure to noxious substances<br>(0.72) |
| Cerebrovascular diseases<br>(0.93)                                   | Ischemic heart diseases<br>(0.88)                                    | Ischemic heart diseases<br>(0.72)                                    |
| Electric shock<br>(0.76)                                             | Assault and sequelae<br>(0.86)                                       | Lower respiratory infections<br>(0.48)                               |
| Tuberculosis<br>(0.70)                                               | Epilepsy<br>(0.63)                                                   | Epilepsy<br>(0.46)                                                   |
| Epilepsy<br>(0.68)                                                   | Nephritis and kidney disease<br>(0.51)                               | Nephritis and kidney disease<br>(0.43)                               |
| Ischemic heart diseases<br>(0.64)                                    | Lower respiratory infections<br>(0.41)                               | Endocrine disorder<br>(0.37)                                         |
| Lower respiratory infections<br>(0.64)                               | Lymphoma and multiple myeloma<br>(0.39)                              | Lymphoma and multiple myeloma<br>(0.36)                              |
| Malignant neoplasm of liver and intrahepatic bile ducts<br>(0.58)    | Tuberculosis<br>(0.34)                                               | Inflammatory heart disease<br>(0.24)                                 |

Class

- Communicable, maternal, neonatal, and nutritional diseases
- Non-communicable diseases
- Injuries

**Figure S19.** The top 15 leading causes of death of adolescents aged 15 to 19 in 2004, 2010 and 2019. Note: \*, MR = Mortality rate.

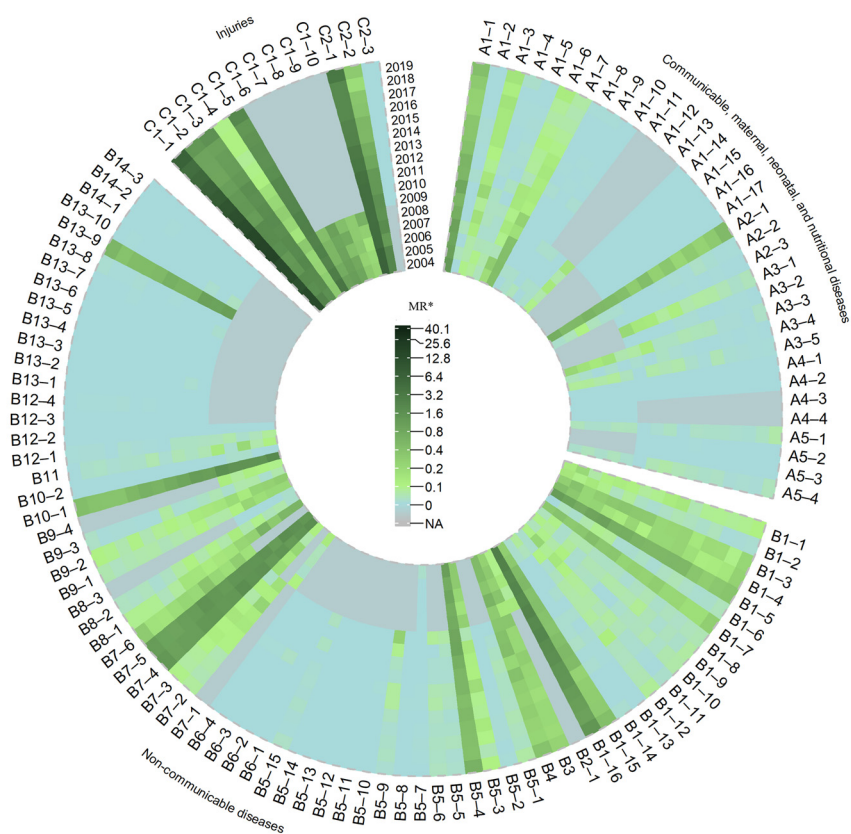

**Figure S20.** The ASMR of adolescents aged 20 to 24 by cause of death, 2004 to 2019.

Note: \*, MR = Mortality rate.

| Leading cause in 2004<br>(MR* (per 100,000))                         | Leading cause in 2010<br>(MR (per 100,000))                          | Leading cause in 2019<br>(MR (per 100,000))                          |
|----------------------------------------------------------------------|----------------------------------------------------------------------|----------------------------------------------------------------------|
| Road injuries<br>(14.12)                                             | Road injuries<br>(17.47)                                             | Road injuries<br>(6.45)                                              |
| Intentional self-harm and sequelae<br>(6.58)                         | Intentional self-harm and sequelae<br>(4.66)                         | Intentional self-harm and sequelae<br>(3.36)                         |
| Drowning<br>(3.69)                                                   | Drowning<br>(2.72)                                                   | Drowning<br>(2.17)                                                   |
| Leukaemia<br>(2.87)                                                  | Leukaemia<br>(2.09)                                                  | Falls<br>(1.62)                                                      |
| Accidental poisoning by and exposure to noxious substances<br>(2.52) | Accidental poisoning by and exposure to noxious substances<br>(1.94) | Leukaemia<br>(1.44)                                                  |
| Assault and sequelae<br>(2.36)                                       | Falls<br>(1.79)                                                      | Ischemic heart diseases<br>(1.37)                                    |
| Nephritis and kidney disease<br>(2.09)                               | Ischemic heart diseases<br>(1.51)                                    | Accidental poisoning by and exposure to noxious substances<br>(1.35) |
| Ischemic heart diseases<br>(1.77)                                    | Cerebrovascular diseases<br>(1.48)                                   | Cerebrovascular diseases<br>(1.19)                                   |
| Falls<br>(1.65)                                                      | Assault and sequelae<br>(1.34)                                       | Epilepsy<br>(0.63)                                                   |
| Cerebrovascular diseases<br>(1.41)                                   | Nephritis and kidney disease<br>(1.18)                               | Congenital malformations of the circulatory system<br>(0.57)         |
| Tuberculosis<br>(1.33)                                               | Congenital malformations of the circulatory system<br>(0.95)         | Lower respiratory infections<br>(0.48)                               |
| Malignant neoplasm of liver and intrahepatic bile ducts<br>(1.17)    | Epilepsy<br>(0.87)                                                   | Nephritis and kidney disease<br>(0.43)                               |
| Electric shock<br>(1.13)                                             | Tuberculosis<br>(0.80)                                               | Lymphoma and multiple myeloma<br>(0.42)                              |
| Epilepsy<br>(1.12)                                                   | Malignant neoplasm of liver and intrahepatic bile ducts<br>(0.68)    | Tuberculosis<br>(0.41)                                               |
| Accidental mechanical asphyxia<br>(1.01)                             | Lower respiratory infections<br>(0.41)                               | Endocrine disorder<br>(0.38)                                         |

Class 
 ■ Communicable, maternal, neonatal, and nutritional diseases
 ■ Non-communicable diseases
 ■ Injuries

**Figure S21.** The top 15 leading causes of death of adolescents aged 20 to 24 in 2004, 2010 and 2019. Note: \*, MR = Mortality rate
